# Supplementary material for: 3,3′-Diethylthiatricarbocyanine Iodide: A Highly Sensitive Chiroptical Reporter of DNA Helicity and Sequence
Source: Int J Mol Sci. 2011 Nov 16;12(11):8052–62. doi: 10.3390/ijms12118052 (PMC3233455; doi:10.3390/ijms12118052)

# Supplementary Information

Jung Kyu Choi <sup>1</sup>, Alessandro D'Urso <sup>1,2</sup>, Mitch Trauernicht <sup>2</sup>, Murtaza Shabbir-Hussain <sup>1</sup>,  
Andrea E. Holmes <sup>2</sup> and Milan Balaz <sup>1,\*</sup>

<sup>1</sup> Department of Chemistry, University of Wyoming, Laramie, WY 82071, USA;  
E-Mails: jchoi4@uwyo.edu (J.K.C.); adurso@unict.it (A.D.); mshabbir@uwyo.edu (M.S.-H.)

<sup>2</sup> Doane College, 1014 Boswell, Crete, NE 68333, USA;  
E-Mails: mitchell.trauernicht@doane.edu (M.T.); andrea.holmes@doane.edu (A.E.H.)

\* Author to whom correspondence should be addressed; E-Mail: mbalaz@uwyo.edu;  
Tel.: +1-307-766-4330; Fax: +1-307-766-2807.

*Received: 21 October 2011; in revised form: 2 November 2011 / Accepted: 7 November 2011 /  
Published: 16 November 2011*

---

**Abstract:** Using UV-vis absorption and circular dichroism (CD) spectroscopies, we explored the binding interactions of 3,3'-diethylthiatricarbocyanine iodide (**Cy7**) with polynucleotides of different sequences and helicity. CD showed to be a very diagnostic tool giving different spectroscopic chiroptical signatures for all explored DNA sequences upon **Cy7** binding. **Cy7** was able to spectroscopically discriminate between the right handed B-DNA of poly(dG-dC)<sub>2</sub> and its left handed Z-DNA counterpart induced by spermine or Co(III)hexamine via nearly opposite induced circular dichroic signal.

**Keywords:** Cy7 cyanine dye; left-handed Z-DNA; circular dichroism; DNA recognition; sensing

---

**Figure S1.** Intensity change of the CD signals at 622 nm, 770 nm, and 800 nm as a function of the **Cy7** concentration when titrated with poly(dA-dT)<sub>2</sub> (red curve with triangles), poly(dG-dC)<sub>2</sub> (blue curve with squares), poly(dG).poly(dC) (green curve with spheres). Titration step: [Cy7] = 2.0  $\mu$ M. Conditions: [DNA] = 50  $\mu$ M, 10 mM NaCl, 5% MeOH + Na-cacodylate buffer (1mM, pH = 7.0).

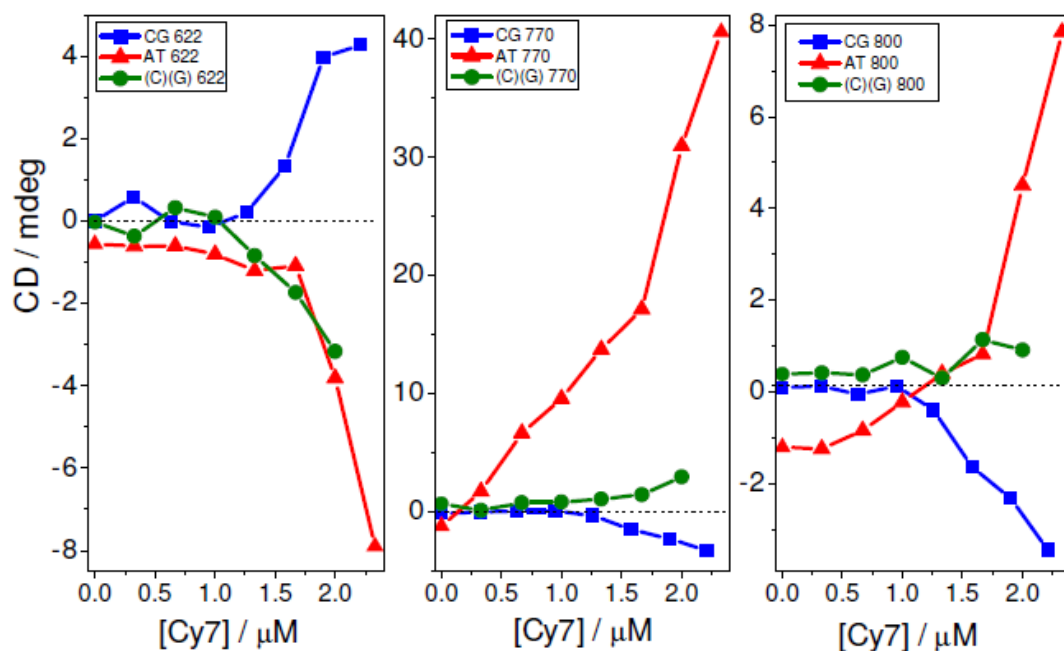

**Figure S2.** CD spectra of **Cy7** titrated to Co(III) induced Z-poly(dG-dC)<sub>2</sub>. Titration step: [Cy7] = 2.0  $\mu$ M. Conditions: [Z-poly(dG-dC)<sub>2</sub>] = 50  $\mu$ M, [Co(III)] = 12  $\mu$ M, [NaCl] = 10 mM, 5% MeOH + Na-cacodylate buffer (1mM, pH = 7.0).

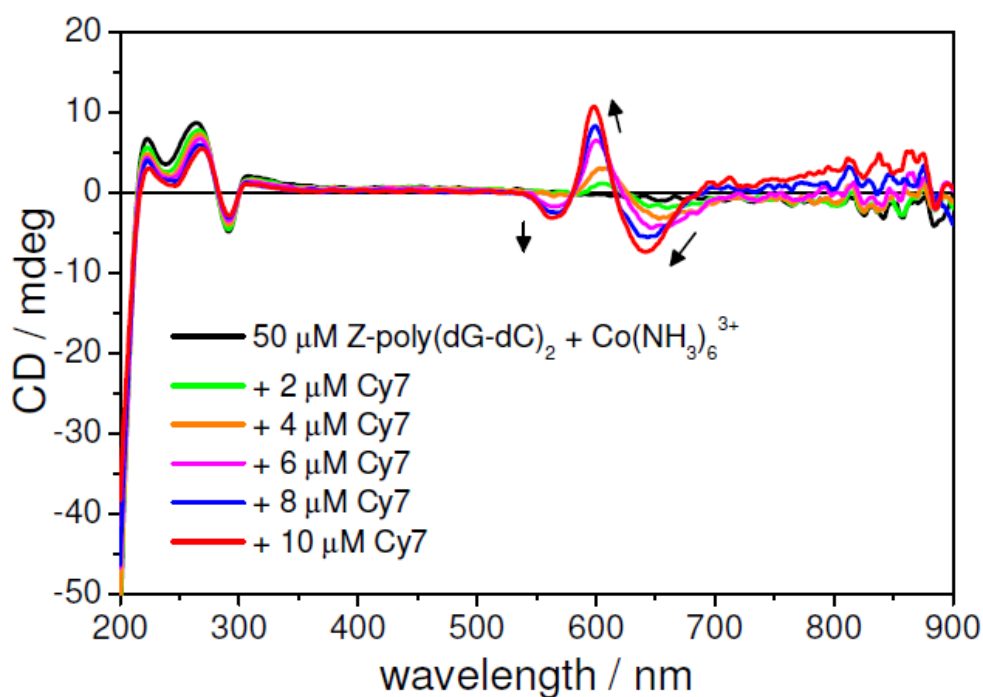

**Figure S3.** CD spectra comparison of **Cy7** bound to poly(dG-dC)<sub>2</sub> (blue) and Co(III) induced Z-poly(dGdC)<sub>2</sub> (red). Inset: intensity change of the CD signal at 645 nm as a function of the **Cy7** concentration. Conditions: [DNA] = 50  $\mu$ M, [Co(III)] = 12  $\mu$ M, [NaCl] = 10 mM, 5% MeOH + Na-cacodylate buffer (1mM, pH = 7.0). Titration step: [Cy7] = 2.0  $\mu$ M.

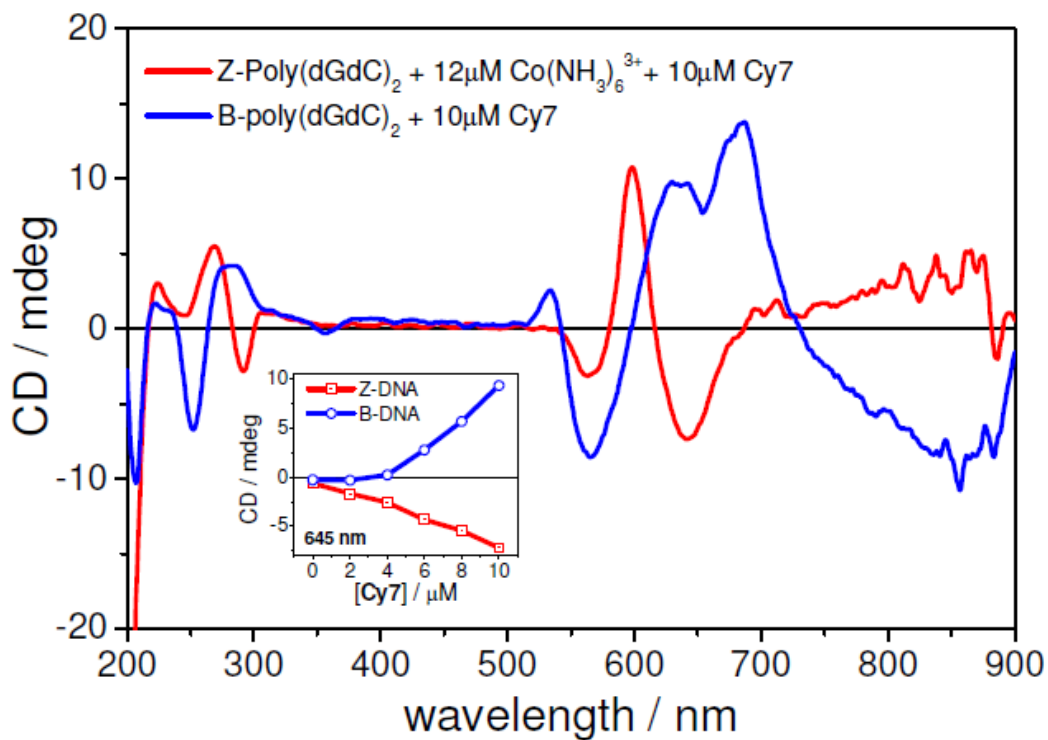

Supplement: Supplementary file 1 [file ijms-12-08052-s001.pdf]
